# Supplementary material for: On point perforating defects in bilayer structures
Source: Royal Society of Chemistry journal article supplement (doi:10.1039/d3cp03719c), 2023-01-01
Supplement: d3cp03719c1.pdf [file d3cp03719c1.pdf]

# Supplementary Materials

for paper:

**“On point through defects  
in bilayer extended structures”**

**Authors:**

*Aleksey I. Kochaev*

*Vladimir V. Efimov*

*Savas Kaya*

*Roberto Flores-Moreno*

*Konstantin P. Katin*

*Mikhail M. Maslov*

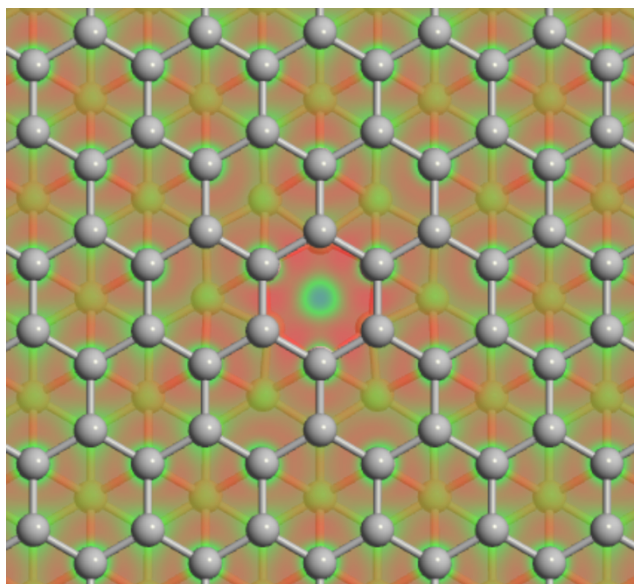

SFig. 1. Electron localization function of the defective borophene-graphene: map for monovacancy. Map located in an area of borophene layer

STable 1. The kind, image, and cohesive energy of the considered defects at the boron layer

| Kind                       | Image                                                                                | Cohesive energy (eV/atom) |
|----------------------------|--------------------------------------------------------------------------------------|---------------------------|
| Single vacancy             | 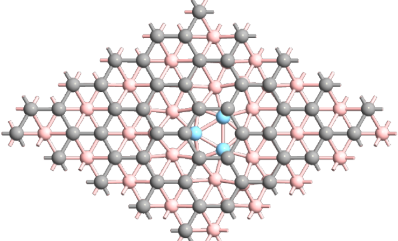   | 6.12                      |
| Single vacancy             |    | 6.20                      |
| Double vacancy of 1st kind |   | 6.15                      |
| Double vacancy of 1st kind |  | 6.22                      |
| Double vacancy of 2nd kind |  | 6.11                      |
| Double vacancy of 2nd kind |  | 6.18                      |
